# Supplementary material for: Joint effects of serum vitamin D insufficiency and periodontitis on insulin resistance, pre-diabetes, and type 2 diabetes: results from the National Health and Nutrition Examination Survey (NHANES) 2009–2010
Source: PubMed Central journal article supplement — BMJ Open Diabetes Res Care. 2018 Jul 23;6(1):e000535. doi: 10.1136/bmjdrc-2018-000535 (PMC6067347; doi:10.1136/bmjdrc-2018-000535), 2018-07-23
Supplement: bmjdrc-2018-000535supp001.pdf [file bmjdrc-2018-000535supp001.pdf]

**SUPPLEMENTARY Figure S1: Flow diagram of inclusion and exclusions criteria for both analytical samples from the National Health and Nutritional Examination Survey (NHANES) 2009-2010**

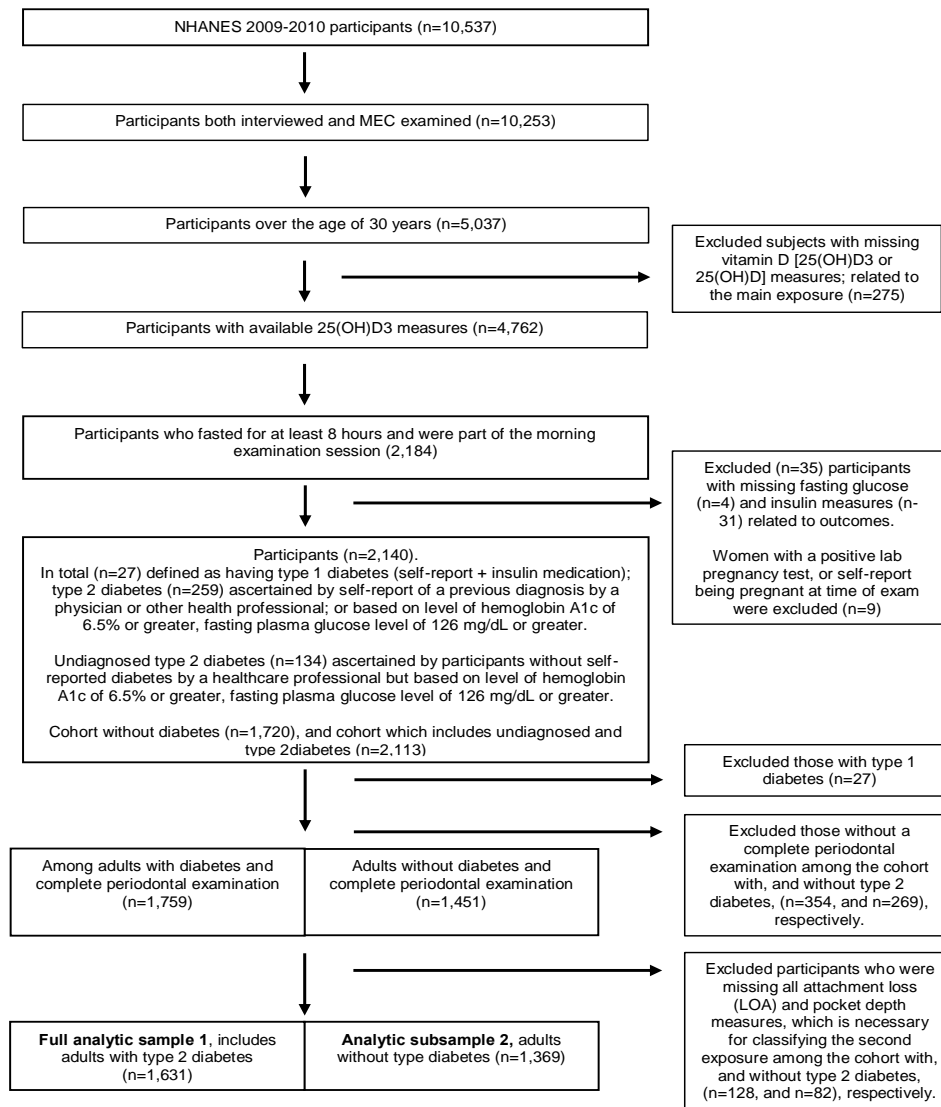

**SUPPLEMENTARY Table S1: Participant characteristics of adult participants over 30 years of age by prediabetes from the National Health and Nutritional Examination Survey (NHANES) 2009-2010\***

| Characteristics                               | Analytic subsample 2 |              |                   |              |                   |              |
|-----------------------------------------------|----------------------|--------------|-------------------|--------------|-------------------|--------------|
|                                               | Prediabetes §        |              |                   |              |                   |              |
|                                               | Total                |              | Present           |              | Absent            |              |
|                                               | N                    | %            | N                 | %            | N                 | %            |
| <b>Unweighted sample</b>                      | <b>1369</b>          | <b>87.43</b> | <b>817</b>        | <b>54.92</b> | <b>552</b>        | <b>45.08</b> |
| <b>Weighted sample</b>                        | <b>118 980 564</b>   |              | <b>65 340 787</b> |              | <b>53 639 777</b> |              |
| <b>Age categories (%)</b>                     |                      |              |                   |              |                   |              |
| Age ≥ 30 to < 45 years (R)                    | 530                  | 41.2         | 245               | 32.1         | 285               | 52.4         |
| Age ≥ 45 and < 65 years                       | 584                  | 44.0         | 376               | 48.0         | 208               | 39.1         |
| Age ≥ 65 years                                | 255                  | 14.8         | 196               | 20.0         | 59                | 8.50         |
| <b>Sex (%)</b>                                |                      |              |                   |              |                   |              |
| Male (R)                                      | 637                  | 47.3         | 443               | 55.5         | 194               | 37.4         |
| Female                                        | 732                  | 52.7         | 374               | 44.5         | 358               | 62.6         |
| <b>Race/ethnicity (%)</b>                     |                      |              |                   |              |                   |              |
| Non-Hispanic white (R)                        | 664                  | 70.3         | 375               | 67.3         | 289               | 74.0         |
| Non-Hispanic Black                            | 223                  | 10.5         | 150               | 12.2         | 73                | 8.4          |
| Total Hispanic including multiracial          | 482                  | 19.2         | 292               | 20.5         | 190               | 17.7         |
| <b>Education (%)</b>                          |                      |              |                   |              |                   |              |
| Some College or higher (R)                    | 716                  | 62.2         | 390               | 56.6         | 326               | 69.0         |
| High school diploma                           | 301                  | 22.1         | 188               | 24.6         | 113               | 19.1         |
| Less than high school                         | 348                  | 15.7         | 236               | 18.8         | 112               | 12.0         |
| <b>Health Insurance (%)</b>                   |                      |              |                   |              |                   |              |
| Yes (R)                                       | 1010                 | 80.7         | 588               | 78.4         | 422               | 83.5         |
| No                                            | 359                  | 19.3         | 229               | 21.6         | 130               | 16.5         |
| <b>Poverty income ratio, PIR (%)</b>          |                      |              |                   |              |                   |              |
| PIR ≥ 350% = PIR ≥ 3.50 (R)                   | 419                  | 44.3         | 235               | 41.9         | 184               | 47.2         |
| 130% ≤ PIR < 350% = 1.30 ≤ PIR < 3.50         | 452                  | 32.8         | 263               | 32.1         | 189               | 33.7         |
| PIR < 130% = PIR < 1.30                       | 373                  | 15.9         | 240               | 17.8         | 133               | 13.6         |
| Did not answer (missing)                      | 125                  | 7.0          | 79                | 8.2          | 46                | 5.5          |
| <b>Body mass index, BMI categories (%)</b>    |                      |              |                   |              |                   |              |
| Normal BMI < 25 kg/m <sup>2</sup> (R)         | 370                  | 30.1         | 165               | 21.3         | 205               | 40.7         |
| Overweight BMI ≥ 25 to <30 kg/m <sup>2</sup>  | 506                  | 35.5         | 305               | 36.8         | 201               | 34.0         |
| Obese BMI ≥ 30 kg/m <sup>2</sup>              | 488                  | 34.4         | 343               | 41.9         | 145               | 25.4         |
| <b>Physical activity (%)</b>                  |                      |              |                   |              |                   |              |
| Active, vigorous-to-moderate (R)              | 804                  | 63.9         | 466               | 61.5         | 338               | 66.9         |
| Sedentary                                     | 565                  | 36.1         | 351               | 38.5         | 214               | 33.1         |
| <b>Smoking status (%)</b>                     |                      |              |                   |              |                   |              |
| Former or never smoker (R)                    | 1114                 | 83.5         | 651               | 81.6         | 463               | 85.9         |
| Current smoker                                | 255                  | 16.5         | 166               | 18.4         | 89                | 14.1         |
| <b>Serum vitamin D3 [25(OH)D3] status (%)</b> |                      |              |                   |              |                   |              |
| † Sufficient levels (R)                       | 904                  | 72.1         | 530               | 70.7         | 374               | 73.8         |
| Insufficient levels (<50 nmol/L)              | 465                  | 27.9         | 287               | 29.3         | 178               | 26.2         |
| <b>Serum vitamin [25(OH)D] status (%) †</b>   |                      |              |                   |              |                   |              |
| Sufficient levels (R)                         | 960                  | 76.6         | 560               | 73.8         | 400               | 80.0         |

|                                            |     |      |     |      |     |      |
|--------------------------------------------|-----|------|-----|------|-----|------|
| Insufficient levels (<50 nmol/L)           | 409 | 23.4 | 257 | 26.2 | 152 | 20.0 |
| <b>Season of examination (%)</b>           |     |      |     |      |     |      |
| Summer, May 1st to Oct 3 <sup>rd</sup> (R) | 760 | 61.1 | 432 | 58.8 | 328 | 64.0 |
| Winter, Nov 1st to April 30 <sup>th</sup>  | 609 | 38.9 | 385 | 41.3 | 224 | 36.0 |
| <b>Periodontitis (%) ‡</b>                 |     |      |     |      |     |      |
| None or mild (R)                           | 782 | 63.6 | 407 | 56.7 | 375 | 72.1 |
| Moderate or severe                         | 587 | 36.4 | 410 | 43.4 | 177 | 27.9 |

Missing values: education (n=4; 0.14%); BMI (n=5; 0.32%).

\* NHANES survey analytic guidelines recommend the relative standard error is not larger than 30%, all estimates for each subgroup were less than 30%.

† Serum vitamin D [25(OH)D], and vitamin D3 [25(OH)D3] insufficiency is defined as levels (< 50 nmol/L or < 20 ng/ml).

‡ Case Definitions for Periodontitis based on the definition from the Division of Oral Health at the Centers for Disease Control and Prevention (CDC), in collaboration with the American Academy of Periodontology (AAP).

§ Prediabetes based on level of hemoglobin A1c (HbA1c) of 5.7-6.4% (39 to 47 mmol/mol), fasting plasma glucose level of 100-125 mg/dL or adults who reported having been told by a health professional that they have any of the following: prediabetes, impaired fasting glucose, impaired glucose tolerance, or borderline diabetes. Prediabetes excluded those with diagnosed and undiagnosed type 2 diabetes.

25(OH)D, 25-hydroxyvitamin D; 25(OH)D3, 25-hydroxyvitamin D3; BMI, body mass index; PIR, poverty income ratio; R, reference category.

**SUPPLEMENTARY Table S3: Logistic regression models assessing the joint effect of serum vitamin D3 [25(OH)D3] concentrations and periodontitis with HOMA-IR, prediabetes, and type 2 diabetes among overweight and/or obese adults over 30 years of age from the National Health and Nutritional Examination Survey (NHANES) 2009-2010**

| Outcomes                                     |                                                       | HOMA-IR*                                  |                      | Prediabetes†                      |                      | Type 2 diabetes‡                  |                      |                              |
|----------------------------------------------|-------------------------------------------------------|-------------------------------------------|----------------------|-----------------------------------|----------------------|-----------------------------------|----------------------|------------------------------|
| Exposures                                    |                                                       | With/without outcome§ (n)                 | Odds Ratio; (95% CI) | With/without outcome§ (n)         | Odds Ratio; (95% CI) | With/without outcome§ (n)         | Odds Ratio; (95% CI) |                              |
| <b>G = 0</b><br>(periodontitis none or mild) | <b>E = 0</b><br>[25(OH)D3] sufficiency                | 105/254                                   | reference (1.00)     | 213/146                           | reference (1.00)     | 40/359                            | reference (1.00)     |                              |
|                                              | <b>E = 1</b><br>[25(OH)D3] insufficiency¶             | 77/136                                    | 1.25; (0.86, 1.82)   | 124/89                            | 0.77; (0.47, 1.25)   | 39/213                            | 1.21; (0.55, 2.68)   |                              |
|                                              | <b>G = 1</b><br>(periodontitis moderate or severe) †† | <b>E = 0</b><br>[25(OH)D3] sufficiency    | 82/184               | 1.01; (0.63, 1.61)                | 193/73               | 1.04; (0.52, 2.07)                | 72/266               | 1.29; (0.72, 2.31)           |
|                                              |                                                       | <b>E = 1</b><br>[25(OH)D3] insufficiency¶ | 60/96                | 1.51; (0.95, 2.42)                | 118/38               | 1.24; (0.61, 2.53)                | 75/156               | <b>2.95; (1.40, 6.19) **</b> |
| <b>P value ‡‡</b>                            |                                                       |                                           | 0.55                 |                                   | 0.30                 |                                   | 0.14                 |                              |
|                                              |                                                       | <b>With/without outcome§§ (n)</b>         |                      | <b>With/without outcome§§ (n)</b> |                      | <b>With/without outcome§§ (n)</b> |                      |                              |
| <b>G = 0</b><br>(periodontitis none or mild) | <b>E = 0</b><br>[25(OH)D3] sufficiency                | 105/254                                   | reference (1.00)     | 213/146                           | reference (1.00)     | 40/359                            | reference (1.00)     |                              |
|                                              | <b>E = 1</b><br>[25(OH)D3] insufficiency¶             | 77/136                                    | 1.28; (0.90, 1.84)   | 124/89                            | 0.79; (0.50, 1.28)   | 39/213                            | 1.22; (0.56, 2.64)   |                              |
|                                              | <b>G = 1</b><br>(periodontitis moderate or severe) †† | <b>E = 0</b><br>[25(OH)D3] sufficiency    | 82/184               | 1.04; (0.61, 1.78)                | 193/73               | 0.97; (0.48, 1.92)                | 72/266               | 1.34; (0.75, 2.41)           |
|                                              |                                                       | <b>E = 1</b><br>[25(OH)D3] insufficiency¶ | 60/96                | 1.50; (0.89, 2.54)                | 118/38               | 1.13; (0.56, 2.28)                | 75/156               | <b>3.16; (1.59, 6.27) **</b> |
| <b>P value ‡‡</b>                            |                                                       |                                           | 0.68                 |                                   | 0.36                 |                                   | 0.13                 |                              |

\* Homeostatic model assessment of insulin resistance (HOMA-IR)  $\geq 4.17$  (population specific 75th percentile) established using fasting glucose and insulin levels by the following formula:  $HOMA-IR = [glucose (mmol/L) * insulin (\mu U/mL) / 22.5]$ . HOMA-IR, excluded those with diagnosed and undiagnosed type 2 diabetes.

† Prediabetes based on level of hemoglobin A1c (HbA1c) of 5.7- 6.4% (39-47 mmol/mol), fasting plasma glucose level of 100-125 mg/dL or adults who reported having been told by a health professional that they have any of the following: prediabetes, impaired fasting glucose, impaired glucose tolerance, or borderline diabetes. Prediabetes excluded those with diagnosed and undiagnosed type 2 diabetes.

‡ Type 2 diabetes based on self-report of a previous diagnosis by a physician or other health professional; or based on level of hemoglobin A1c of (HbA1c) of 6.5% (48 mmol/mol) or greater, fasting plasma glucose level of 126 mg/dL or greater.

§ Minimally adjusted model for age, sex, race/ethnicity, PIR, season, smoking, physical activity.

¶ Serum vitamin D3 [25(OH)D3] insufficiency defined as levels ( $< 50$  nmol/L or  $< 20$  ng/ml).

\*\* Significance ( $p < 0.05$ ). Statistically significant values are shown in bold.

†† Case Definitions for Periodontitis based on the definition from the Division of Oral Health at the Centers for Disease Control and Prevention (CDC), in collaboration with the American Academy of Periodontology (AAP).

‡‡ Represents multiplicative interaction p value results from adjusted survey logistic models

§§ Fully adjusted model for age, sex, race/ethnicity, education, insurance, season, smoking, physical activity, body mass index.

**SUPPLEMENTARY Table S4: Logistic regression models assessing the joint effect of serum vitamin D [25(OH)D] concentrations and periodontitis with HOMA-IR, prediabetes, and type 2 diabetes among overweight and/or obese adults over 30 years of age from the National Health and Nutritional Examination Survey (NHANES) 2009-2010**

| Outcomes                                              |                                          | HOMA-IR*                          |                      | Prediabetes†                      |                      | Type 2 diabetes‡                  |                                 |
|-------------------------------------------------------|------------------------------------------|-----------------------------------|----------------------|-----------------------------------|----------------------|-----------------------------------|---------------------------------|
| Exposures                                             |                                          | With/without outcome§ (n)         | Odds Ratio; (95% CI) | With/without outcome§ (n)         | Odds Ratio; (95% CI) | With/without outcome§ (n)         | Odds Ratio; (95% CI)            |
| <b>G = 0</b><br>(periodontitis none or mild)          | <b>E = 0</b><br>[25(OH)D] sufficiency    | 116/269                           | reference (1.00)     | 228/157                           | reference (1.00)     | 47/385                            | reference (1.00)                |
|                                                       | <b>E = 1</b><br>[25(OH)D] insufficiency¶ | 66/121                            | 1.08; (0.65, 1.82)   | 109/78                            | 0.97; (0.58, 1.64)   | 32/187                            | 0.94; (0.38, 2.34)              |
| <b>G = 1</b><br>(periodontitis moderate or severe) †† | <b>E = 0</b><br>[25(OH)D] sufficiency    | 88/192                            | 0.93; (0.60, 1.45)   | 202/78                            | 1.04; (0.53, 2.02)   | 91/280                            | 1.47; (0.84, 2.57)              |
|                                                       | <b>E = 1</b><br>[25(OH)D] insufficiency¶ | 54/88                             | 1.57; (0.89, 2.77)   | 109/33                            | 1.74; (0.92, 3.32)   | 56/142                            | <b>2.05; (1.05, 4.03)</b><br>** |
| <b>P value ‡‡</b>                                     |                                          |                                   | 0.17                 |                                   | 0.19                 |                                   | 0.46                            |
|                                                       |                                          | <b>With/without outcome§§ (n)</b> |                      | <b>With/without outcome§§ (n)</b> |                      | <b>With/without outcome§§ (n)</b> |                                 |
| <b>G = 0</b><br>(periodontitis none or mild)          | <b>E = 0</b><br>[25(OH)D] sufficiency    | 116/269                           | reference (1.0)      | 228/157                           | reference (1.00)     | 47/385                            | reference (1.00)                |
|                                                       | <b>E = 1</b><br>[25(OH)D] insufficiency¶ | 66/121                            | 1.12; (0.68, 1.85)   | 109/78                            | 1.01; (0.60, 1.71)   | 32/187                            | 0.97; (0.40, 2.37)              |
| <b>G = 1</b><br>(periodontitis moderate or severe) †† | <b>E = 0</b><br>[25(OH)D] sufficiency    | 88/192                            | 0.96; (0.58, 1.60)   | 202/78                            | 0.97; (0.50, 1.88)   | 91/280                            | 1.53; (0.89, 2.62)              |
|                                                       | <b>E = 1</b><br>[25(OH)D] insufficiency¶ | 54/88                             | 1.56; (0.84, 2.92)   | 109/33                            | 1.58; (0.84, 2.99)   | 56/142                            | <b>2.29; (1.27, 4.12)</b><br>** |
| <b>P value ‡‡</b>                                     |                                          |                                   | 0.24                 |                                   | 0.25                 |                                   | 0.41                            |

\* Homeostatic model assessment of insulin resistance (HOMA-IR)  $\geq 4.17$  (population specific 75th percentile) established using fasting glucose and insulin levels by the following formula:  $HOMA-IR = [glucose (mmol/L) * insulin (\mu U/mL) / 22.5]$ . HOMA-IR, excluded those with diagnosed and undiagnosed type 2 diabetes.

† Prediabetes based on level of hemoglobin A1c (HbA1c) of 5.7- 6.4% (39-47 mmol/mol), fasting plasma glucose level of 100-125 mg/dL or adults who reported having been told by a health professional that they have any of the following: prediabetes, impaired fasting glucose, impaired glucose tolerance, or borderline diabetes. Prediabetes excluded those with diagnosed and undiagnosed type 2 diabetes.

‡ Type 2 diabetes based on self-report of a previous diagnosis by a physician or other health professional; or based on level of hemoglobin A1c (HbA1c) of 6.5% (48 mmol/mol) or greater, fasting plasma glucose level of 126 mg/dL or greater.

§ Minimally adjusted model for age, sex, race/ethnicity, PIR, season, smoking, physical activity.

¶ Serum vitamin D [25(OH)D] insufficiency defined as levels ( $< 50$  nmol/L or  $< 20$  ng/ml).

\*\* Significance ( $p < 0.05$ ). Statistically significant values are shown in bold.

†† Case Definitions for Periodontitis based on the definition from the Division of Oral Health at the Centers for Disease Control and Prevention (CDC), in collaboration with the American Academy of Periodontology (AAP).

‡‡ Represents multiplicative interaction p value results from adjusted survey logistic models

§§ Fully adjusted model for age, sex, race/ethnicity, education, insurance, season, smoking, physical activity, body mass index.

**SUPPLEMENTARY Table S5: Additive interaction measures derived from odds ratios between vitamin D [25(OH)D3], [25(OH)D], and periodontitis on type 2 diabetes among adults ≥ 30 years of age from the National Health and Nutritional Examination Survey (NHANES) 2009-2010**

| Outcome                                        | Type 2 diabetes †                  |                              |             |      |       |                              |  |
|------------------------------------------------|------------------------------------|------------------------------|-------------|------|-------|------------------------------|--|
|                                                | Additive measures of interaction * | Vitamin D3 [25(OH)D3] ‡      |             |      | RERI  | Vitamin D [25(OH)D] ‡        |  |
|                                                |                                    | 95% Confidence Interval (CI) |             |      |       | 95% Confidence Interval (CI) |  |
|                                                |                                    | Lower                        | Upper       |      | Lower | Upper                        |  |
| Relative Excess Risk due to Interaction (RERI) | 1.49 **                            | <b>0.07</b>                  | <b>2.91</b> | 0.68 | -0.54 | 1.90                         |  |
| Attributable proportion (AP)                   | <b>0.53 **</b>                     | <b>0.19</b>                  | <b>0.86</b> | 0.34 | -0.19 | 0.88                         |  |

\* Estimating measures of interaction on the additive scale for vitamin D insufficiency and periodontitis (case definitions for periodontitis based on the definition from the Division of Oral Health at the Centers for Disease Control and Prevention, in collaboration with the American Academy of Periodontology), reference group mild-to-no periodontitis. Relative Excess Risk due to Interaction, RERI = (OR11 - OR10 - OR01 + 1); and Attributable proportion, AP = (OR11 - OR10 - OR01 + 1)/OR11 were derived from previously shown odds ratios (ORs) point estimates from fully adjusted survey logistic procedures with appropriate sample weights and survey design variables.

† Type 2 diabetes based on self-report of a previous diagnosis by a physician or other health professional; or based on level of hemoglobin A1c of (HbA1c) of 6.5% (48 mmol/mol) or greater, fasting plasma glucose level of 126 mg/dL or greater.

‡ Serum vitamin D [25(OH)D], and vitamin D3 [25(OH)D3] insufficiency defined as levels (< 50 nmol/L or < 20 ng/mL). Reference group for vitamin D [25(OH)D], and vitamin D3 [25(OH)D3] sufficiency are levels (≥50 nmol/L or 20 ng/mL).

\*\*Significance at p<0.05. Statistically significant values are shown in bold.
